# Supplementary material for: Effectiveness of a community-centered Newcastle disease vaccine delivery model under paid and free vaccination frameworks in southeastern Kenya
Source: PubMed Central journal article supplement (PMC11293705; doi:10.1371/journal.pone.0308088), 2024-08-01
Supplement: pone.0308088.s004.pdf [file pone.0308088.s004.pdf]

**Data capture sheet for community vaccinators**

| <b>Name of chicken vaccinator.....</b> |                                        | <b>Mobile phone No.</b>                                   |                            |                                   |                                                                                                                        | <b>Date:</b>                                                          |                                       | <b>Time started: .....</b>                                                |                                                                                                    |                          |                          |
|----------------------------------------|----------------------------------------|-----------------------------------------------------------|----------------------------|-----------------------------------|------------------------------------------------------------------------------------------------------------------------|-----------------------------------------------------------------------|---------------------------------------|---------------------------------------------------------------------------|----------------------------------------------------------------------------------------------------|--------------------------|--------------------------|
|                                        |                                        |                                                           |                            |                                   |                                                                                                                        |                                                                       |                                       | <b>Time ended: .....</b>                                                  |                                                                                                    |                          |                          |
| <b>Name of household head</b>          | <b>Phone contact of household head</b> | <b>Belongs to intervention group<br/>1. Yes<br/>2. No</b> | <b>No. of chicken kept</b> | <b>No. of chickens vaccinated</b> | <b>Reason for not vaccinating if any<br/>1. Not at home<br/>2. No prepared<br/>3. Declined<br/>4. Others (specify)</b> | <b>Route of application used<br/>1. Eye<br/>2. Nasal<br/>3. Water</b> | <b>Amount charged for vaccination</b> | <b>Health status of flock<br/>1. All are healthy<br/>2. Some are sick</b> | <b>Other poultry species kept<br/>1. Duck<br/>2. Geese<br/>3. Turkey<br/>4. Dove<br/>5. Others</b> | <b>No. of goats kept</b> | <b>No. of sheep kept</b> |
|                                        |                                        |                                                           |                            |                                   |                                                                                                                        |                                                                       |                                       |                                                                           |                                                                                                    |                          |                          |
|                                        |                                        |                                                           |                            |                                   |                                                                                                                        |                                                                       |                                       |                                                                           |                                                                                                    |                          |                          |
|                                        |                                        |                                                           |                            |                                   |                                                                                                                        |                                                                       |                                       |                                                                           |                                                                                                    |                          |                          |
|                                        |                                        |                                                           |                            |                                   |                                                                                                                        |                                                                       |                                       |                                                                           |                                                                                                    |                          |                          |
|                                        |                                        |                                                           |                            |                                   |                                                                                                                        |                                                                       |                                       |                                                                           |                                                                                                    |                          |                          |
| <b>Any other comment:</b>              |                                        |                                                           |                            |                                   |                                                                                                                        |                                                                       |                                       |                                                                           |                                                                                                    |                          |                          |
