# Supplementary material for: Effectiveness of a community-centered Newcastle disease vaccine delivery model under paid and free vaccination frameworks in southeastern Kenya
Source: PubMed Central journal article supplement (PMC11293705; doi:10.1371/journal.pone.0308088), 2024-08-01
Supplement: pone.0308088.s005.pdf [file pone.0308088.s005.pdf]

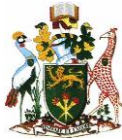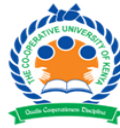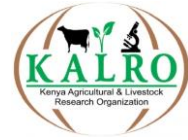

**GENDER INCLUSIVE VACCINE ECOSYSTEM – ENHANCING  
DISTRIBUTION AND DELIVERY SYSTEM FOR NEWCASTLE DISEASE  
(NCD) AND CONTAGIOUS CAPRINE PLEUROPNEUMONIA (CCPP)  
VACCINE AMONG SMALL HOLDER FARMERS IN MAKUENI**

**Form for assessing performance of community vaccinators**

**Ward**..... **Village:** .....

**Name of Community Vaccinator**.....

|     |                                                                                             |  |  |
|-----|---------------------------------------------------------------------------------------------|--|--|
| 1.  | Community vaccinators are transporting vaccines properly (not exposed to sunlight and heat) |  |  |
| 2.  | Vaccines not exposed to sunlight during reconstitution and/or administration                |  |  |
| 3.  | Community vaccinators are reconstituting vaccines properly                                  |  |  |
| 4.  | Community vaccinators are administering vaccines properly in the eye or nostril             |  |  |
| 5.  | Community vaccinators take accurate and legible records                                     |  |  |
| 6.  | Community vaccinators treat the farmers with respect when they visit their homesteads       |  |  |
| 7.  | Community vaccinators are picking vaccines in good time (6.30 -7.30 am)                     |  |  |
| 8.  | Community vaccinators are finishing the job early before the ice melts (before 12 pm)       |  |  |
| 9.  | Target of 100 chickens per day per CV is being met                                          |  |  |
| 10. | Community vaccinators are providing poultry husbandry information and advice to farmers     |  |  |
