# Supplementary material for: Effectiveness of a community-centered Newcastle disease vaccine delivery model under paid and free vaccination frameworks in southeastern Kenya
Source: PubMed Central journal article supplement (PMC11293705; doi:10.1371/journal.pone.0308088), 2024-08-01
Supplement: pone.0308088.s006.pdf [file pone.0308088.s006.pdf]

## Community Vaccinator Profiles

1. Name of community vaccinator:  
 .....

2. Sex: [1] Female [2] Male

3. Marital status of community vaccinator;  
 [1] Single [2] Married [3] Separated [4] Divorced [4] Widowed

4. What is the age of community vaccinator? .....

5. Type of Household: [1] Female-headed household [2] Male-headed household

6. Household size? .....

7. How many children are 5 years and below? .....

8. What is your highest level of Education?

| No.  | Level of education  | Years spent |
|------|---------------------|-------------|
| 1.   | No formal education |             |
| 2.   | Primary             |             |
| .03. | Secondary           |             |
| 4.   | College             |             |
| 5.   | University          |             |
| 6.   | Vocational training |             |

9. What is your source of income?

[1] Farming [2] Salaried employment [3] Informal employment [4] Business  
 [5] Others specify

10. What is your Income range per month (ksh)?

[1] <3,000 [2] 3,000-6,000 [3] 6,001-9,000 [4] 9,001-12, 000 [5] >12000

11. Does your household own the following modes of transport? (Tick all that apply)

[1] Bicycle            [2] Motorcycle

11a. IF YES, are you able to use it (them) whenever you want?

[a] Yes            [b] No

12. Did you use any of the following modes of transport during the vaccination exercise?

| No. | Means of transport   | Tick all that apply |
|-----|----------------------|---------------------|
| 1.  | Household bicycle    |                     |
| 2.  | Borrowed bicycle     |                     |
| 3.  | Household motorcycle |                     |
| 4.  | Borrowed motorcycle  |                     |
| 5.  | Others specify       |                     |

12a. IF used a household motorcycle for transport, ask and tick appropriately if the community vaccinator:

| No. | Means of transport                                                 | Tick all that apply |
|-----|--------------------------------------------------------------------|---------------------|
| 1.  | Incentivized the husband                                           |                     |
| 2.  | Fuelled the motorcycle and was taken around by the husband         |                     |
| 3.  | Fuelled the motorcycle and drove herself                           |                     |
| 4.  | Self-driving CV had to return the motorcycle after specified hours |                     |
| 5.  | Others specify                                                     |                     |
