# Supplementary material for: Effectiveness of a community-centered Newcastle disease vaccine delivery model under paid and free vaccination frameworks in southeastern Kenya
Source: PubMed Central journal article supplement (PMC11293705; doi:10.1371/journal.pone.0308088), 2024-08-01

**CONSORT diagram showing the drop out over time of participants through each stage of the intervention**

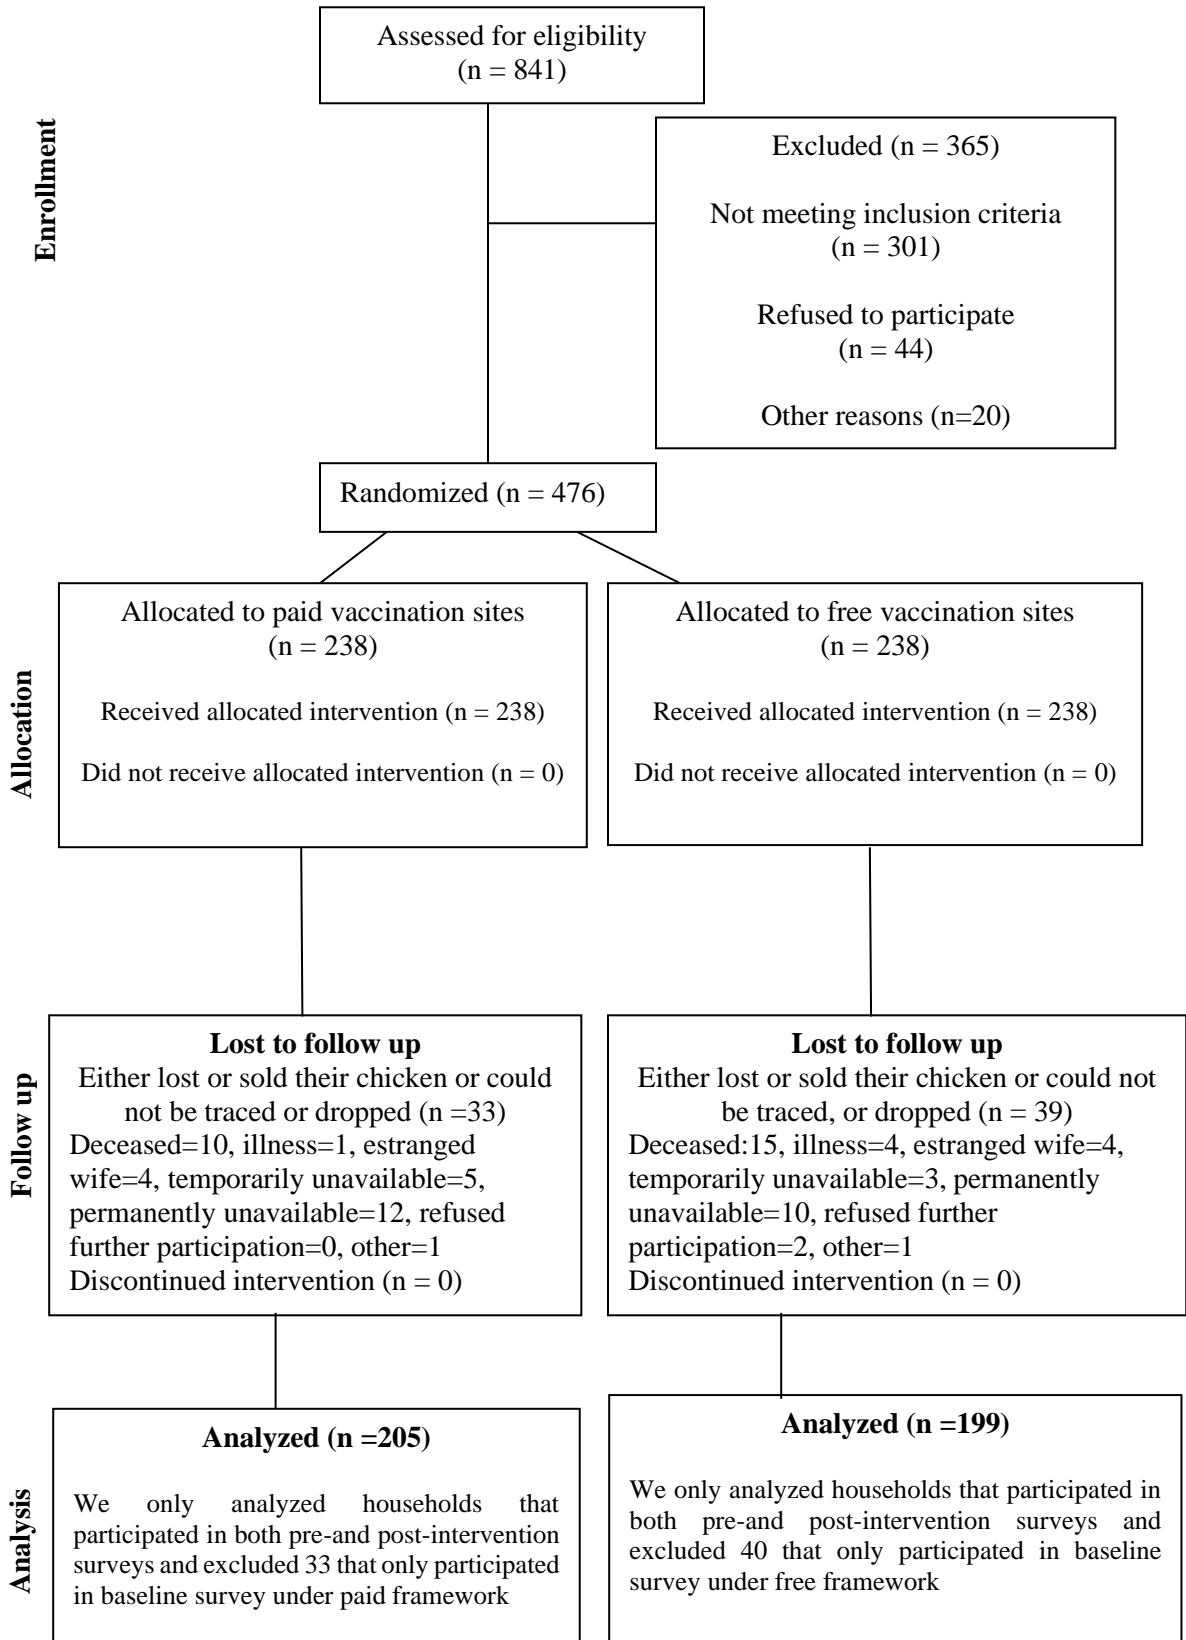

Supplement: pone.0308088.s008.pdf [file pone.0308088.s008.pdf]
